# Supplementary material for: Green carbon dots-embedded polymeric membranes for simultaneous photocatalytic dye degradation and antibacterial activity
Source: Royal Society of Chemistry journal article supplement (doi:10.1039/d6ra00999a), 2026-04-10
Supplement: d6ra00999a1.pdf [file d6ra00999a1.pdf]

*Table S1. Comparative analysis of the developed CD-based membranes against representative conventional photocatalytic or benchmark membrane systems reported in the literature.*

| Membrane system                        | Active component / type                                       | Target / condition                                      | Reported performance                                                                                                                                                                                                                                       | Antibacterial or self-cleaning feature                                  | Comparative note vs. this work                                                                                                                                                           | REF          |
|----------------------------------------|---------------------------------------------------------------|---------------------------------------------------------|------------------------------------------------------------------------------------------------------------------------------------------------------------------------------------------------------------------------------------------------------------|-------------------------------------------------------------------------|------------------------------------------------------------------------------------------------------------------------------------------------------------------------------------------|--------------|
| <b>This work: PVA/PAA-CDs</b>          | Green-synthesized CDs in hydrophilic PVA/PAA matrix           | MB, 2–10 ppm, natural solar irradiation, static contact | Rapid discoloration from the first 24 h; near-complete visual removal by day 7; COD removal close to 100% during the first week and ~94% after 4 weeks; antibacterial activity >97% at 24 h; under combined MB + light conditions, ~92% inhibition at 24 h | Yes, dual photocatalytic + antibacterial performance                    | Advantage: dual-function under natural sunlight and a biodegradable/biocompatible matrix. Limitation: slower time scale than highly optimized UV/visible-light TiO <sub>2</sub> systems. | This work    |
| <b>This work: PPSU-CDs</b>             | Green-synthesized CDs in hydrophobic PPSU matrix              | MB, 2–10 ppm, natural solar irradiation, static contact | Significant discoloration from day 3; transparent solution and membrane by day 7; COD removal ~100% in weeks 1–2 and ~82% by weeks 3–4; antibacterial activity >97% at 24 h; under combined MB + light conditions, ~90% inhibition at 24 h                 | Yes, dual photocatalytic + antibacterial performance                    | Advantage: dual function with a chemically robust matrix; lower dark adsorption than PVA/PAA-CDs but better structural robustness.                                                       | This work    |
| PVA/PAA@PDA membrane                   | Polydopamine-coated electrospun PVA/PAA                       | Methyl blue adsorption                                  | >93% removal within 30 min; maximum adsorption capacity 1147.6 mg g <sup>-1</sup>                                                                                                                                                                          | Recyclable adsorbent                                                    | Strong fast adsorption benchmark, but not photocatalytic and no antibacterial function reported.                                                                                         | <sup>1</sup> |
| rGO/TiO <sub>2</sub> -PPSU UF membrane | Conventional TiO <sub>2</sub> -based hybrid membrane with rGO | Organic pollutants under visible light                  | Reported as having efficient visible-light-driven photocatalytic degradation plus improved antifouling/self-cleaning behavior                                                                                                                              | Self-cleaning / antifouling reported                                    | Good benchmark for conventional visible-light photocatalytic PPSU systems, but the abstracted source does not report simultaneous antibacterial performance.                             | <sup>2</sup> |
| PSF–Ag/CQDs membrane                   | Polysulfone membrane with Ag/CQDs nanofiller                  | Tartrazine dye removal                                  | Enhanced dye-removal performance and improved membrane properties                                                                                                                                                                                          | Not presented as dual antibacterial + photocatalytic MB platform in the | Useful CQD-based benchmark, but focused on dye-removal optimization rather than simultaneous MB degradation and antibacterial action.                                                    | <sup>3</sup> |

|                                     |                                                                  |                                           |                                                                             |                                             |                                                                                                                                                                         |   |
|-------------------------------------|------------------------------------------------------------------|-------------------------------------------|-----------------------------------------------------------------------------|---------------------------------------------|-------------------------------------------------------------------------------------------------------------------------------------------------------------------------|---|
|                                     |                                                                  |                                           |                                                                             | abstracted source                           |                                                                                                                                                                         |   |
| CS-PEG-TiO <sub>2</sub> membrane    | Chitosan/PEG/TiO <sub>2</sub> photocatalytic filtration membrane | MB filtration                             | 99.4% MB elimination during filtration                                      | Fouling observed during operation           | Very high removal benchmark, but the mechanism is strongly tied to filtration/rejection and fouling remained significant; not presented as a dual antibacterial system. | 4 |
| TiO <sub>2</sub> /MXene UF membrane | Conventional TiO <sub>2</sub> -based photocatalytic UF membrane  | Protein fouling / <i>E. coli</i> under UV | Flux recovery ratio of 80% under UV; >95% resistance against <i>E. coli</i> | Yes, antibacterial and antifouling under UV | Strong antibacterial/self-cleaning benchmark, but UV-dependent and not reported for MB degradation in the cited source.                                                 | 5 |

Figure S1 shows the TEM micrograph of the individual CDs. It should be noted that they are agglomerated by the evaporation process to obtain them in powder form, which is why they appear larger.

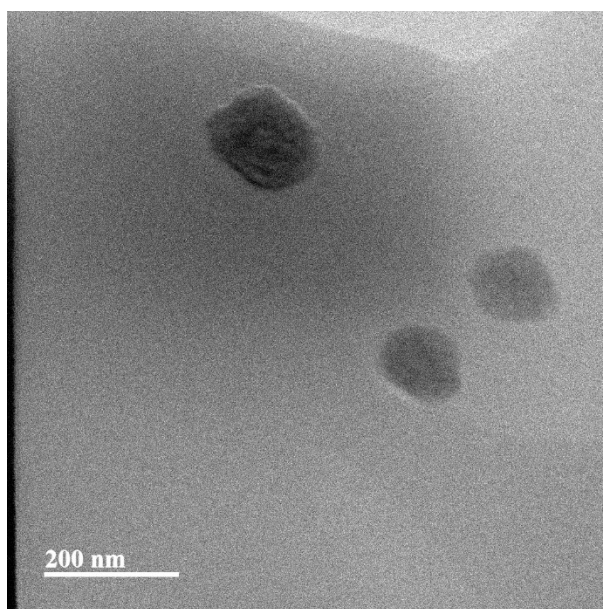

**Figure S1.** TEM micrograph of the individual CDs

Recyclability test: Membrane PVA/PAA-CDs reuse 5 different times after 7 days of degradation

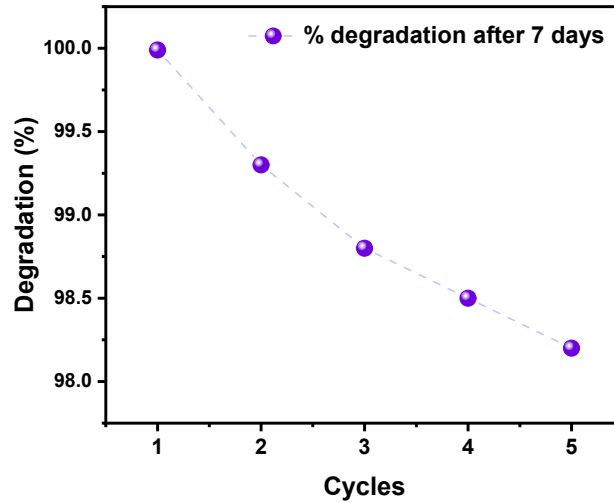

**Figure S2.** Membrane reuse after the photodegradation test

*Table S2. Absorbance data after photodegradation using a pseudo-first order model based on the Langmuir-Hinshelwood approach*

| <b>PVA/PAA-CDs</b> |                      |                                    |                                         |                                   |
|--------------------|----------------------|------------------------------------|-----------------------------------------|-----------------------------------|
| <b>t(h)</b>        | <b>A<sub>0</sub></b> | <b>A<sub>t</sub></b>               | <b>ln (A<sub>0</sub>/A<sub>t</sub>)</b> | <b>Degradation efficiency (%)</b> |
| 0                  | 0.7510               | 0.7510                             | 0                                       | 0                                 |
| 24                 | 0.7510               | 0.2717                             | 1.017                                   | 63.82                             |
| 48                 | 0.7510               | 0.0342                             | 3.089                                   | 95.44                             |
| 72                 | 0.7510               | 0.0194                             | 3.656                                   | 97.41                             |
| 120                | 0.7510               | 0.0045                             | 5.11                                    | 99.40                             |
| <b>PPSU-CDs</b>    |                      |                                    |                                         |                                   |
| <b>t(h)</b>        | <b>A<sub>t</sub></b> | <b>A<sub>t</sub>/A<sub>0</sub></b> | <b>ln (A<sub>t</sub>/A<sub>0</sub>)</b> | <b>Degradation efficiency (%)</b> |
| 0                  | 0.7510               | 0.7510                             | 0                                       | 0                                 |
| 24                 | 0.7510               | 0.4175                             | 0.588                                   | 44.40                             |
| 48                 | 0.7510               | 0.0683                             | 2.398                                   | 90.90                             |

|     |        |        |       |        |
|-----|--------|--------|-------|--------|
| 72  | 0.7510 | 0.0088 | 4.446 | 98.82  |
| 120 | 0.7510 | 0.0014 | 6.285 | 99.813 |

### Straight adjustment

$$y = kt + b$$

#### PVA/PAA-CDs

$$y = 0.0434t + 0.2844$$

$$K = 0.0434h^{-1}$$

$$R^2 = 0.9470$$

#### PPSU-CDs

$$y = 0.0562t + 0.2254$$

$$K = 0.0562h^{-1}$$

$$R^2 = 0.9715$$

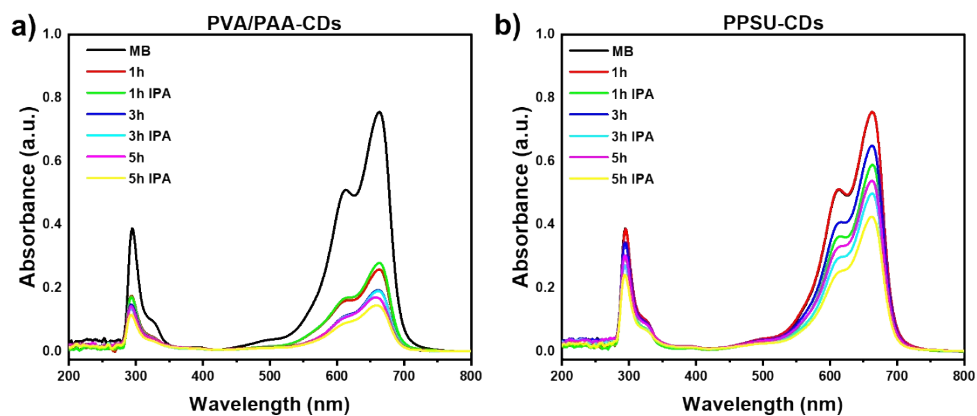

Figure S3. Spectra UV of free radical scavenging using isopropanol

#### References

- 1 J. Yan, Y. Huang, Y. E. Miao, W. W. Tjiu and T. Liu, *J. Hazard. Mater.*, 2015, **283**, 730–739.
- 2 F. Dai, S. Zhang, Q. Wang, H. Chen, C. Chen, G. Qian and Y. Yu, *Front. Chem.*, 2021, **9**, 753741.
- 3 J. Y. Gan, W. C. Chong, L. C. Sim, C. H. Koo, Y. L. Pang, E. Mahmoudi and A. W. Mohammad, *Membranes 2020, Vol. 10*, 2020, **10**, 1–21.

- 4 H. En-nasri, A. Aarfane, B. Hatimi, N. Labjar, M. Bensemlali, A. Baraket, M. Bakasse, N. Zine, N. Jaffrezic-Renault, S. El Hajjaji and H. Nasrellah, *Eng* 2026, Vol. 7, 2026, **7**, 43.
- 5 In situ oxidized TiO<sub>2</sub> /MXene ultrafiltration membrane with photocatalytic self-cleaning and antibacterial properties - RSC Advances (RSC Publishing) DOI:10.1039/D3RA02230G, [https://pubs.rsc.org/en/content/articlehtml/2023/ra/d3ra02230g?utm\\_source=chatgpt.com](https://pubs.rsc.org/en/content/articlehtml/2023/ra/d3ra02230g?utm_source=chatgpt.com), (accessed 24 March 2026).
- 6 A. López-Amador, B. I. Jiménez-Muñoz, A. Gutierrez-Ortega, D. Eduardo Elizondo-Quiroga, G. Luna-Bárceñas, L. Gerardo Silva Vidaurri, M. Estevez and B. Liliana España-Sánchez, *Mater. Lett.*, 2024, **366**, 136569.
